# Supplementary material for: Exploiting induced pluripotent stem cell-derived macrophages to unravel host factors influencing Chlamydia trachomatis pathogenesis
Source: PubMed Central journal article supplement (PMC5414054; doi:10.1038/ncomms15013), 2017-04-25
Supplement: ncomms15013-s1.pdf [file ncomms15013-s1.pdf]

**Supplementary Figure 1: Validation of the mutants by sequencing and phenotypic assays.** Panels A and B showed the bi-allelic mutations were validated by PCR and sequencing. Specifically, the insertion of the cassette into the correct locus was confirmed by visualising on 1% E-gel (Life Tech) PCR products of indicated sizes were generated by gene specific (GF1 and GR1) and cassette specific (ER and PF) primers for both 5' and 3' ends (Supplementary Data 1 and Panel A). To check the CRISPR site on the non-targeted allele, PCR products were generated either from across the locus, using the 5' and the 3' gene specific genotyping primers (GF1-GR1), or from around the site using primers 5F-3R (Supplementary Data 1) that would amplify a short, around 500 bp, amplicon. In both cases the PCR products were treated with exonuclease and alkaline phosphatase (NEB) and Sanger sequenced using primers SF and SR (Supplementary Data 1 and Panel B). Both mutant human iPS lines were able to differentiate into macrophages and expressed macrophage markers (CD11b, CD14, CD16, CD68 as measured by flow cytometry; red histograms represent cells stained with control isotype and blue histograms represent cells stained with relevant antibody; Panel C). Both mutant iPSdMs showed an ability to phagocytose using pHrodo Green dye-labeled E.coli (ThermoFisher) and measuring increased fluorescence by flow cytometry- red histograms represent untreated cells and blue histograms represent cells treated with pHrodo Green dye labelled E.coli for 30 mins (Panel D). For clarity we only show representative flow cytometry plots for the IRF5<sup>-/-</sup> H09 and IL10RA<sup>-/-</sup> D07 mutant clones but we observed similar macrophage markers and phagocytic results for the IRF5<sup>-/-</sup> F07 and IL10RA<sup>-/-</sup> E09 mutant clones.

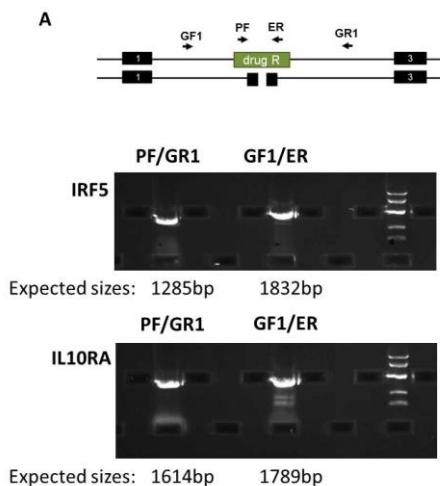

**B**

IRF5 clone H09: CRISPR mutation in exon 3 resulting in 97 bp deletion frameshift

```

GAAGGCGTGGATGAAGCCGATCCGGCCAAGTGGAAAGGCCAACCTGCGCTGTGCCCTTAACAAGAGCCGGGACTTCCGCCTCATCTACGACGGGCCCGGGACATGCCACCTCAGGCC
(F)
-----CCGGGACATGCCACCTCAGCCC
(R)
-----CCGGGACATGCCACCTCAGCCC

```

IRF5 clone F07: CRISPR mutation in exon 3 resulting in 2 bp addition frameshift

```

GAAGGCGTGGATGAAGCCGATCCGGCCAAGTGGAAAGGCCAACCTGCGCTGTGCCCTTAACAAGAGCCGGGACTTCCGCCTCATCPACGACGGGCCCGGGACATGCCACCTCAGGCC
(F)
-----CCGGGACATGCCACCTCAGCCC
(R)
-----CCGGGACATGCCACCTCAGCCC

```

IL10RA clone D07: CRISPR mutation in exon 4 resulting in 7 bp deletion frameshift

```

TTCAGCTACCCAGGCCCAAGATGGCCCCCGCAAAATGACACATATGAAGCATCTTCAGTCACTTCCGAGAGTATGAGATTGCCATTCCGAAGGTGCCGGGAAACTTACGGTATGGGG
(F)
-----GCAAGGTGCCGGGAAACTTACGGTATGGGG
(R)
-----GCAAGGTGCCGGGAAACTTACGGTATGGGG

```

IL10RA clone E09: CRISPR mutation in exon 4 resulting in 1 bp addition frameshift

```

TTCAGCTACCCAGGCCCAAGATGGCCCCCGCAAAATGACACATATGAAGCATCTTCAGTCACTTCCGAGAGTATGAGATTGCCATTCCGAAGGTGCCGGGAAACTTACGGTATGGGG
(F)
-----GCAAGGTGCCGGGAAACTTACGGTATGGGG
(R)
-----GCAAGGTGCCGGGAAACTTACGGTATGGGG

```

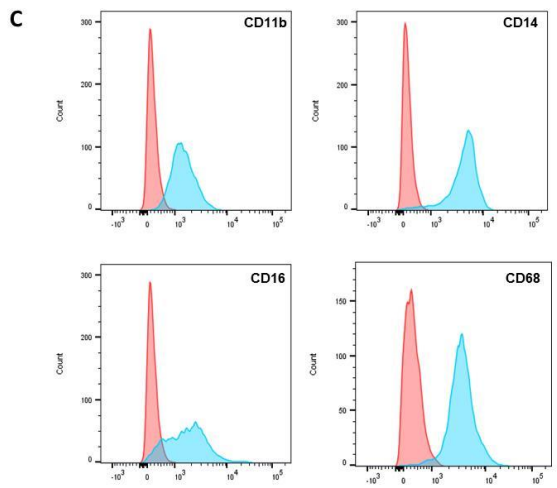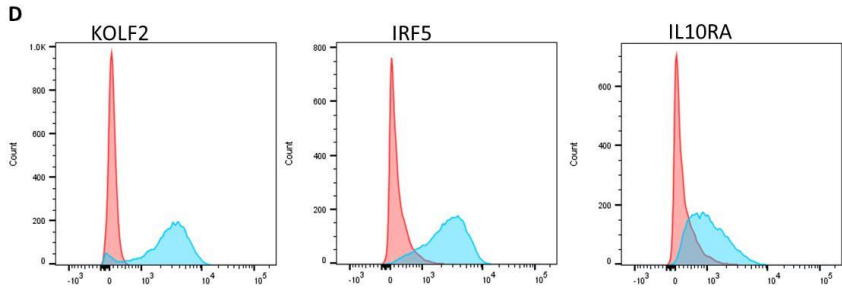

**Supplementary Table 1:** PCR primers and CRISPR sequences utilized in generation and genotyping of IRF5<sup>-/-</sup> and IL10RA<sup>-/-</sup> iPSC mutant clones.

|                                                            |                                                            |
|------------------------------------------------------------|------------------------------------------------------------|
| <b>CRISPR sites (PAM site underlined)</b>                  |                                                            |
| Left Crispr_IRF5                                           | <u>CCAAGT</u> GGAAGGCCAACCTGCGC                            |
| Right Crispr_IRF5                                          | GACTTCCGCCTCATCTACGAC <u>GG</u>                            |
|                                                            |                                                            |
| Left Crispr_IL10RA                                         | <u>CCCCG</u> CAAATGACACATATGAAA                            |
| Right Crispr_IL10RA                                        | GTATGAGATTGCCATT <u>CGCAAGG</u>                            |
|                                                            |                                                            |
| <b>Gibson primers (append sequence underlined)</b>         |                                                            |
| IRF5_5F                                                    | <u>AACGACGGCCAGTGAATTCGATGTCATGTAGGCTG</u><br>TCTTAATGCTTC |
| IRF5_5R                                                    | <u>TATCGTTATGCGCCTTGATCTGTCCCATAGGAGACT</u><br>CTACTGT     |
| IRF5_3F                                                    | <u>CTGAGCTAGCCATCAGTGATGATGGGTC</u> ACTGGCA<br>TATCAGGAAT  |
| IRF5_3R                                                    | <u>CCATGATTACGCCAAGCTTGATAGTAAAGAATAGG</u><br>GTGTCATGTGGG |
|                                                            | -                                                          |
| IL10RA_5F                                                  | <u>AACGACGGCCAGTGAATTCGATTATTCGCTCATG</u><br>ATGTCCTCTAGG  |
| IL10RA_5R                                                  | <u>TATCGTTATGCGCCTTGATGAATACCATGAGACTT</u><br>GAGGGCTG     |
| IL10RA_3F                                                  | <u>CTGAGCTAGCCATCAGTGATGTGCCATTGGGAACT</u><br>TTGCTTAT     |
| IL10RA_3R                                                  | <u>CCATGATTACGCCAAGCTTGATTGAAATTTGTTGC</u><br>AGATCTAGCAGG |
|                                                            |                                                            |
| <b>Universal sequencing primers, Intermediate vector</b>   |                                                            |
| p19F                                                       | aactgttgggaagggcgatc                                       |
| ZP1                                                        | GAAGTCGTCCTCCACGAAGT                                       |
| ZP2                                                        | GAACTGTGGTTACGCGAATG                                       |
| p19R                                                       | gtagctcactcattaggcac                                       |
|                                                            |                                                            |
| <b>Universal sequencing primers, Final vector</b>          |                                                            |
| p19F                                                       | aactgttgggaagggcgatc                                       |
| EF1aR1                                                     | CTCTGGGTTCTACGTTAGTG                                       |
| pA_R                                                       | CGCGTCGAGAAGTTCCTATTC                                      |
| p19R                                                       | gtagctcactcattaggcac                                       |
|                                                            |                                                            |
| <b>Cassette PCR primers for genotyping targeted allele</b> |                                                            |
| ER                                                         | TGATATCGTGGTATCGTTATGCGCCT                                 |
| PF                                                         | CATGTCTGGATCCGGGGGTACCGCGTCGAG                             |
|                                                            |                                                            |
| <b>Gene specific PCR primers for</b>                       |                                                            |

|                                                                            |                            |
|----------------------------------------------------------------------------|----------------------------|
| <b>genotyping targeted allele</b>                                          |                            |
| IRF5_GF1                                                                   | GACTGTAGAATTTCCACTGGAATGG  |
| IRF5_GR1                                                                   | CGGCCACTTGACATCCTCTTTG     |
|                                                                            |                            |
| IL10RA_GF1                                                                 | TATGGCATTATCTCTTTGCACCTG   |
| IL10RA_GR2                                                                 | TCCTCTGCATTGAGACTTAAATGAC  |
|                                                                            |                            |
| <b>Gene-specific PCR primers for genotyping non-target allele</b>          |                            |
| IRF5_PR2                                                                   | GTAAAGGAGTCAATGTCGGAGGAG   |
| IRF5_PF1                                                                   | CAACTGTGAGGAGATCAAGACAAAG  |
|                                                                            |                            |
| IL10RA_PF1                                                                 | TATTTTCGCTCATGATGTCCTCTAGG |
| IL10RA_PR1                                                                 | GAACAGCAGAAGACTGTAACAACAG  |
|                                                                            |                            |
| <b>Gene-specific sequencing primers for genotyping non-targeted allele</b> |                            |
| IRF5_SR1                                                                   | GTGTCATGACCTAGCGGGAG       |
| IRF5_SF1                                                                   | GGAGCAGGGACTATGGATGC       |
|                                                                            |                            |
| IL10RA_SF1                                                                 | TGACAAACCTGTGGCCAAGT       |
| IL10RA_SR1                                                                 | TTCTACTCCCTCCTCTGCCC       |
